# Supplementary material for: Excellent physicochemical and sensing characteristics of a RexOy based pH sensor at low post-deposition annealing temperature
Source: Royal Society of Chemistry journal article supplement (doi:10.1039/d2ra01177h), 2022-01-01
Supplement: d2ra01177h1.pdf [file d2ra01177h1.pdf]

## Supplementary Information

### **Excellent Physicochemical and Sensing Characteristics of $\text{Re}_x\text{O}_y$ Based pH Sensor at Low Post-deposition Annealing Temperature**

Munmun Das<sup>a</sup>, Titisha Chakraborty<sup>a</sup>, Kin Fong Lei<sup>b</sup>, Chan Yu Lin<sup>c</sup>, Chyuan Haur Kao<sup>a,c,d,e,\*</sup>

---

<sup>a</sup> Department of Electronic Engineering, Chang Gung University, 259 Wen-Hwa 1st Road, Kwei-Shan, Tao-Yuan 333, Taiwan, ROC.

<sup>b</sup> Biomedical Engineering, Chang Gung University, Taoyuan, Taiwan

<sup>c</sup> Kidney Research Center, Department of Nephrology, Chang Gung Memorial Hospital, No.5, Fuxing St., Guishan Dist., Taoyuan City 333, Taiwan ROC.

<sup>d</sup> Department of Electronic Engineering, Ming Chi University of Technology, 284 Gungjuan Rd., Taishan Dist., New Taipei City 24301, Taiwan, ROC

<sup>e</sup> Center for Green Technology, Chang Gung University, 259 Wen-Hwa 1st Road, Kwei-Shan, Tao-Yuan 333, Taiwan, ROC.

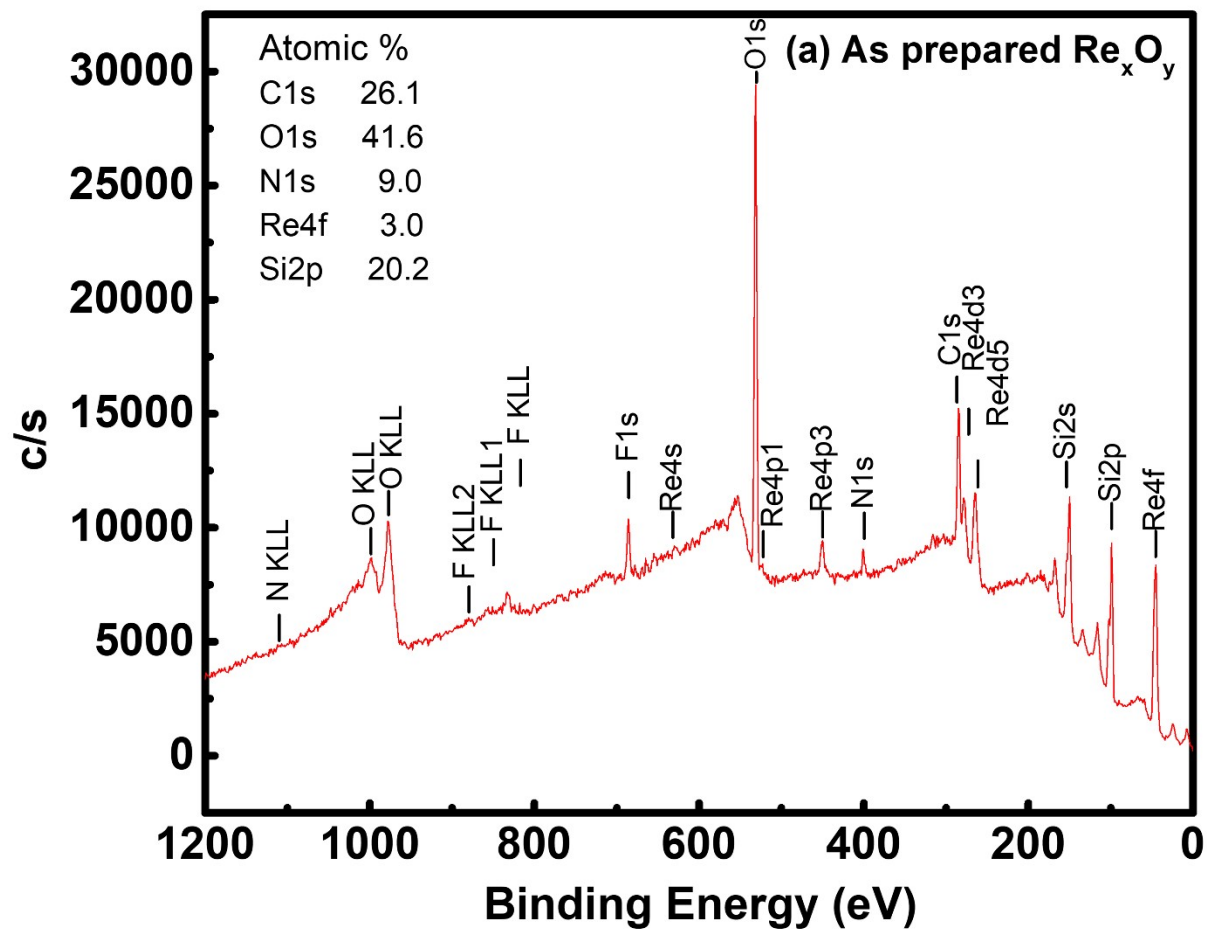

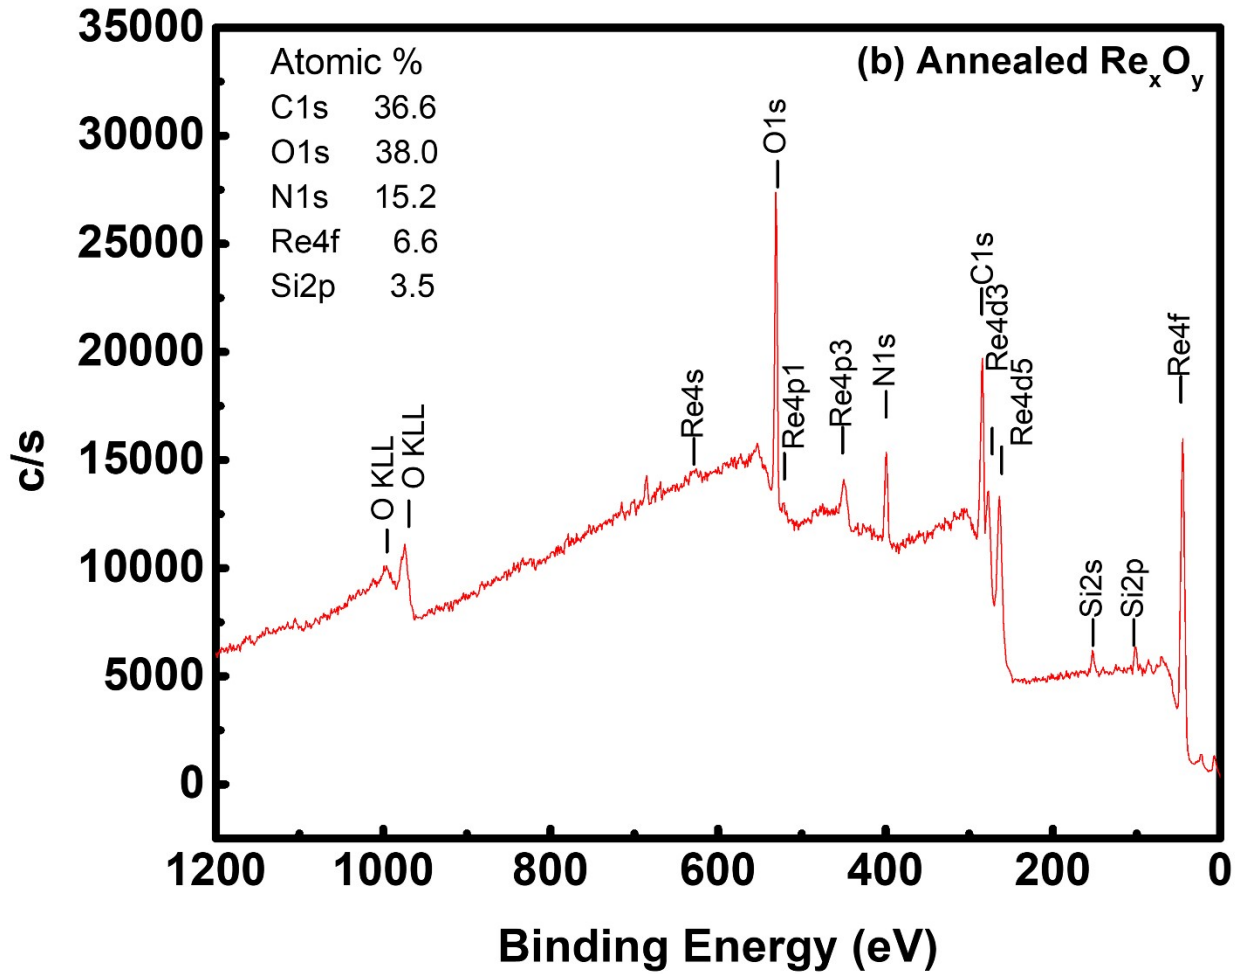

Fig. S1 XPS Survey of (a) as-prepared (b) 220°C annealed  $\text{Re}_x\text{O}_y$ .

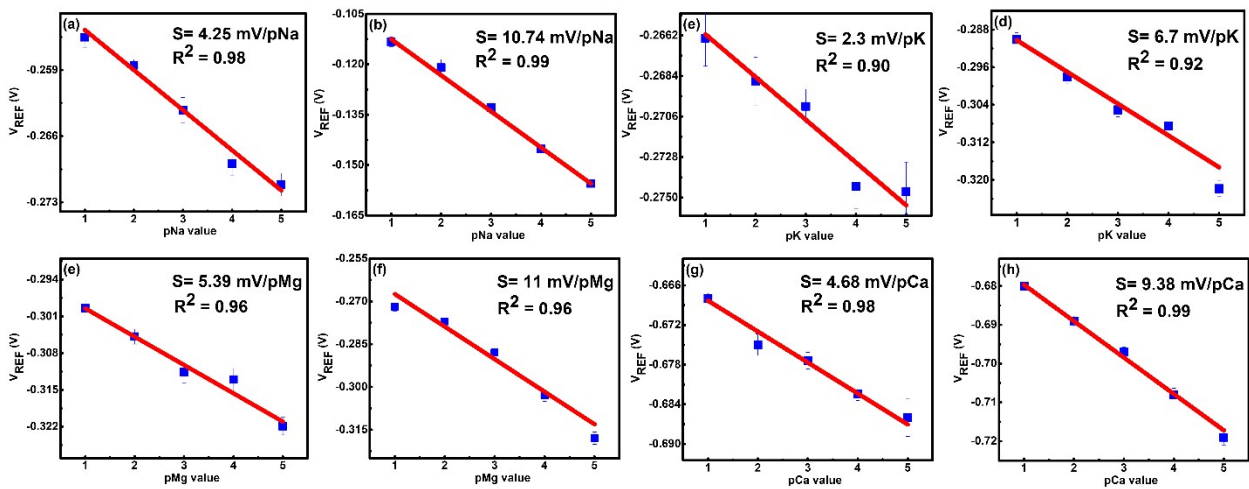

Fig. S2 (a)  $\text{Na}^+$  (c)  $\text{K}^+$  (e)  $\text{Mg}^{2+}$  (g)  $\text{Ca}^{2+}$  sensitivity of as-prepared  $\text{Re}_x\text{O}_y$ , (b)  $\text{Na}^+$  (d)  $\text{K}^+$  (f)  $\text{Mg}^{2+}$  (h)  $\text{Ca}^{2+}$  sensitivity 220°C annealed  $\text{Re}_x\text{O}_y$ .
